# Supplementary material
Source: Springer Nature journal article supplement (https://www.springermedizin.de/resource/supplementary/13012_2011_393_MOESM2_ESM.pdf/9629954)
Supplement: MOESM2 [file 9629954]

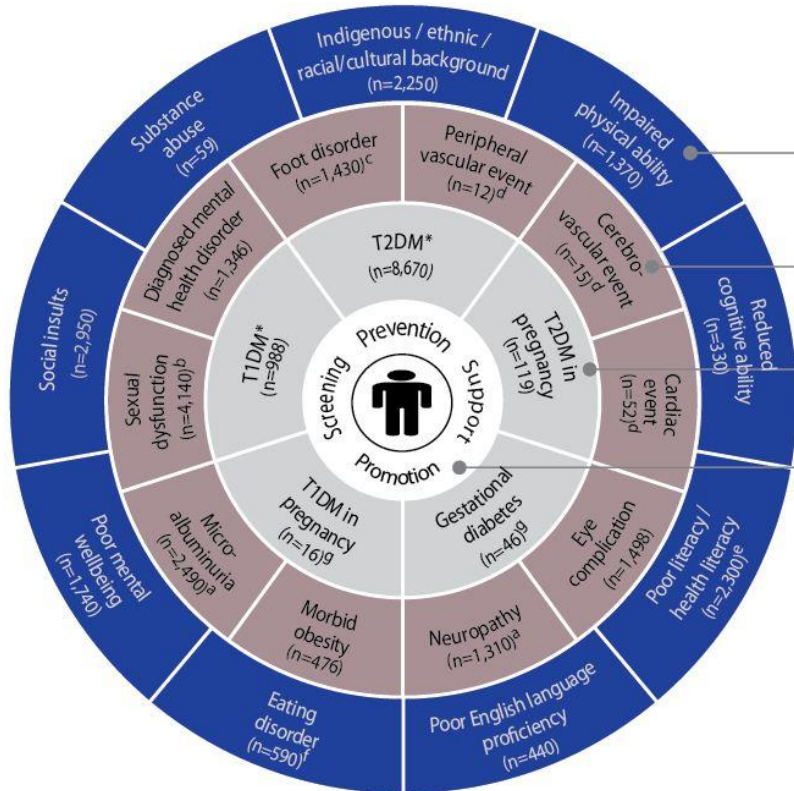

Level 4: Factors impacting on capacity to self care

Level 3: Diabetes complications or events

Level 2: Type of diabetes

Level 1: General population

**KEY**  
 T1DM - Type 1 diabetes mellitus  
 T2DM - Type 2 diabetes mellitus  
 na - data not available  
 \* Newly diagnosed or established
